# Supplementary material for: Heart Failure and Mortality of Adult Survivors from Acute Myocarditis Requiring Intensive Care Treatment - A Nationwide Cohort Study
Source: PubMed Central journal article supplement — Int J Med Sci. 2017 Sep 20;14(12):1241–50. doi: 10.7150/ijms.20618 (PMC5666557; doi:10.7150/ijms.20618), 2017-09-20

Table S1. ICD-9-CM codes used for the diagnosis or treatment in the current study

| Variable                              | Source                                                                                  | Code                                                                        |
|---------------------------------------|-----------------------------------------------------------------------------------------|-----------------------------------------------------------------------------|
| Diabetes                              | ICD-9 CM                                                                                | 250                                                                         |
| Hypertension                          | ICD-9 CM                                                                                | 401–405                                                                     |
| Dyslipidemia                          | ICD-9 CM                                                                                | 272                                                                         |
| Chronic obstructive pulmonary disease | ICD-9 CM                                                                                | 490–496                                                                     |
| Ventricular tachycardia/fibrillation  | ICD-9 CM                                                                                | 427.1, 427.4                                                                |
| High-degree atrioventricular block    | ICD-9 CM                                                                                | 426.0, 426.12, 426.13                                                       |
| Acute renal failure                   | ICD-9 CM                                                                                | 584                                                                         |
| Dialysis                              | 1. ICD-9 CM in files of registry for catastrophic illness patients<br><br>2. Order code | 1. 585<br>2. 58001C, 58027C                                                 |
| Stroke                                | ICD-9 CM                                                                                | 430–436                                                                     |
| Pneumonia                             | ICD-9 CM                                                                                | 480–486, 5070                                                               |
| Sepsis                                | ICD-9 CM                                                                                | 038, 5990, 7854, 99662, 99762, 7070, 44024, 6826, 73027, 72886, 7907, 59010 |
| Heart failure                         | ICD-9 CM                                                                                | 428                                                                         |

Table S2. Intensive management and resuscitation strategies

| Variable                 | Non-MCS    | IABP      | ECMO       | <i>P</i> |
|--------------------------|------------|-----------|------------|----------|
| Patient number           | 851        | 99        | 195        | —        |
| Ventilator support       | 170 (20.0) | 45 (45.5) | 113 (57.9) | <0.001   |
| Ventilator days          | 2.5±8.2    | 7.4±12.6  | 16.9±17.8  | <0.001   |
| Electrical Cardioversion | 62 (7.3)   | 22 (22.2) | 98 (50.3)  | <0.001   |
| CPR                      | 57 (6.7)   | 17 (17.2) | 62 (31.8)  | <0.001   |
| CPR time (minutes)       |            |           |            | 0.015    |
| <10                      | 40 (70.2)  | 8 (47.1)  | 28 (45.2)  |          |
| 10~30                    | 7 (12.3)   | 6 (35.3)  | 11 (17.7)  |          |
| >30                      | 10 (17.5)  | 3 (17.6)  | 23 (37.1)  |          |
| Temporal PPM             | 63 (7.4)   | 18 (18.2) | 50 (25.6)  | <0.001   |
| CVVHD                    | 4 (0.5)    | 4 (4.0)   | 50 (25.6)  | <0.001   |
| Heart transplantation    | 0 (0.0)    | 0 (0.0)   | 6 (3.1)    | <0.001   |
| ICU stays (days)         | 6.3±9.7    | 10.3±11.6 | 18.9±19.0  | <0.001   |
| Length of stay (days)    | 10.3±17.7  | 14.6±15.2 | 21.5±23.2  | <0.001   |
| Follow up (years)        | 4.3±4.1    | 3.9±4.1   | 2.3±3.3    | <0.001   |

CPR: cardiopulmonary resuscitation; CVVHD: continue venovenous hemofiltration, ICU: intensive care unit; ECMO: extracorporeal membrane oxygenation; IABP: intra-aortic balloon pump; MCS: mechanical circulation support

Table S3. Baseline characteristics and management on admission between Non-MCS with inotropic agents, IABP and ECMO groups

| Variable                                            | Non-MCS<br>with inotropic<br>agents |           |            | <i>P</i> |
|-----------------------------------------------------|-------------------------------------|-----------|------------|----------|
|                                                     | IABP                                | ECMO      |            |          |
| Number of patients                                  | 328                                 | 99        | 195        | —        |
| Male gender                                         | 179 (55.1)                          | 59 (59.6) | 88 (45.1)  | 0.029    |
| Age (years)                                         | 41.8±15.0                           | 44.8±15.6 | 40.5±13.1  |          |
| Age group (years)                                   |                                     |           |            | 0.018    |
| 18~39                                               | 153 (46.6)                          | 45 (45.5) | 99 (50.8)  |          |
| 40~59                                               | 128 (39.0)                          | 30 (30.3) | 77 (39.5)  |          |
| ≥60                                                 | 47 (14.3)                           | 24 (24.2) | 19 (9.7)   |          |
| Underlying disease                                  |                                     |           |            |          |
| Hypertension                                        | 26 (7.9)                            | 12 (12.1) | 12 (6.2)   | 0.204    |
| Diabetes                                            | 31 (9.5)                            | 13 (13.1) | 10 (5.1)   | 0.054    |
| Dyslipidemia                                        | 6 (1.8)                             | 5 (5.1)   | 1 (0.5)    | 0.028    |
| COPD                                                | 10 (3.0)                            | 6 (6.1)   | 8 (4.1)    | 0.386    |
| <b>Examination during the admission</b>             |                                     |           |            |          |
| Heart MRI                                           | 18 (5.5)                            | 4 (4.0)   | 7 (3.6)    | 0.579    |
| Cardiac biopsy                                      | 14 (4.3)                            | 8 (8.1)   | 45 (23.1)  | <0.001   |
| Serum virus detection                               | 217 (66.2)                          | 65 (65.7) | 166 (85.1) | <0.001   |
| <b>Intravenous medications during the admission</b> |                                     |           |            |          |
| Dobutamine                                          | 108 (32.9)                          | 57 (57.6) | 105 (53.8) | <0.001   |
| Milrinone                                           | 1 (0.3)                             | 3 (3.0)   | 29 (14.9)  | <0.001   |
| Dopamine                                            | 312 (95.1)                          | 73 (73.7) | 172 (88.2) | <0.001   |
| Norepinephrine                                      | 85 (25.9)                           | 39 (39.4) | 119 (61.0) | <0.001   |
| Epinephrine                                         | 84 (25.6)                           | 37 (37.4) | 154 (79.0) | <0.001   |
| High dose steroids                                  | 14 (4.3)                            | 5 (5.1)   | 26 (13.3)  | <0.001   |
| IVIg                                                | 3 (0.9)                             | 2 (2.0)   | 21 (10.8)  | <0.001   |
| Heparin                                             | 119 (36.3)                          | 73 (73.7) | 181 (92.8) | <0.001   |
| Enoxaparin                                          | 34 (10.4)                           | 12 (12.1) | 12 (6.2)   | 0.161    |
| <b>Oral medication for maintenance</b>              |                                     |           |            |          |
| ACEi/ARB                                            | 128 (39.0)                          | 48 (48.5) | 69 (35.4)  | 0.093    |
| Beta blocker                                        | 78 (23.8)                           | 39 (39.4) | 53 (27.2)  | 0.009    |

| Variable            | Non-MCS<br>with inotropic<br>agents |           |           | <i>P</i> |
|---------------------|-------------------------------------|-----------|-----------|----------|
|                     |                                     | IABP      | ECMO      |          |
| Digoxin             | 62 (18.9)                           | 24 (24.2) | 37 (19.0) | 0.477    |
| K sparing diuretics | 42 (12.8)                           | 28 (28.3) | 27 (13.8) | 0.001    |
| Lipidemia           | 13 (4.0)                            | 8 (8.1)   | 6 (3.1)   | 0.123    |
| Anti-platelets      | 132 (40.2)                          | 50 (50.5) | 57 (29.2) | 0.001    |

Abbreviations:

ACEi/ARB: angiotensin converting enzyme inhibitors/angiotensin receptor blocker;

COPD: chronic obstructive pulmonary disease; ECMO: extracorporeal membrane

oxygenation; IABP: intra-aortic balloon pump; IVIG: intravenous immunoglobulin;

MCS: mechanical circulation support; MRI: magnetic resonance imaging;

Table S4. Intensive management and resuscitation strategies between Non-MCS with inotropic agents, IABP and ECMO groups

| Variable                 | Non-MCS<br>with<br>inotropic<br>agents |           |            | <i>P</i> |
|--------------------------|----------------------------------------|-----------|------------|----------|
|                          |                                        | IABP      | ECMO       |          |
| Number of patients       | 328                                    | 99        | 195        | —        |
| Ventilator support       | 121 (36.9)                             | 45 (45.5) | 113 (57.9) | <0.001   |
| Ventilator days          | 4.9±11.0                               | 7.4±12.6  | 16.9±17.8  | <0.001   |
| Electrical cardioversion | 45 (13.7)                              | 22 (22.2) | 98 (50.3)  | <0.001   |
| CPR                      | 47 (14.3)                              | 17 (17.2) | 62 (31.8)  | <0.001   |
| CPR time                 |                                        |           |            | 0.012    |
| <10 minutes              | 34 (72.3)                              | 8 (47.1)  | 28 (45.2)  |          |
| 10~30 minutes            | 6 (12.8)                               | 6 (35.3)  | 11 (17.7)  |          |
| >30 minutes              | 7 (14.9)                               | 3 (17.6)  | 23 (37.1)  |          |
| Temporal pacemaker       | 37 (11.3)                              | 18 (18.2) | 50 (25.6)  | <0.001   |
| CVVHD                    | 4 (1.2)                                | 4 (4.0)   | 50 (25.6)  | <0.001   |
| Heart transplantation    | 0 (0.0)                                | 0 (0.0)   | 6 (3.1)    | 0.001    |
| ICU stay (days)          | 8.8±12.7                               | 10.3±11.6 | 18.9±19.0  | <0.001   |
| Length of stay (days)    | 13.0±18.3                              | 14.6±15.2 | 21.5±23.2  | <0.001   |
| Follow up (years)        | 4.2±4.4                                | 3.9±4.1   | 2.3±3.3    | <0.001   |

Abbreviations:

CPR: cardiopulmonary resuscitation; CVVHD: continuous venovenous hemofiltration, ICU: intensive care unit; ECMO: extracorporeal membrane oxygenation; IABP: intra-aortic balloon pump; MCS: mechanical circulation support

Table S5. In-hospital complications between Non-MCS with inotropic agents, IABP and ECMO groups

| Variable             | Number of events (%)               |           |           | Adjusted odds ratios and 95% confidence intervals‡ |       |                       |        |                  |       |
|----------------------|------------------------------------|-----------|-----------|----------------------------------------------------|-------|-----------------------|--------|------------------|-------|
|                      |                                    |           |           | IABP vs. Non-MCS with                              |       | ECMO vs. Non-MCS with |        | ECMO vs. IABP    |       |
|                      | Non-MCS                            | IABP      | ECMO      | inotropic agents                                   |       | inotropic agents      |        |                  |       |
|                      | with inotropic agents<br>(n = 328) | (n = 99)  | (n = 195) | OR (95% CI)                                        | P     | OR (95% CI)           | P      | OR (95% CI)      | P     |
| VT/VF                | 30 (9.1)                           | 12 (12.1) | 34 (17.4) | 1.46 (0.71–2.99)                                   | 0.305 | 1.91 (1.12–3.27)      | 0.017  | 1.36 (0.66–2.80) | 0.405 |
| High-degree AV block | 28 (8.5)                           | 8 (8.1)   | 11 (5.6)  | 1.00 (0.43–2.28)                                   | 0.994 | 0.62 (0.30–1.28)      | 0.196  | 0.70 (0.27–1.83) | 0.471 |
| Acute renal failure  | 46 (14.0)                          | 13 (13.1) | 50 (25.6) | 0.90 (0.46–1.77)                                   | 0.767 | 2.32 (1.46–3.68)      | <0.001 | 2.54 (1.28–5.03) | 0.007 |
| New use of dialysis  | 17 (5.2)                           | 6 (6.1)   | 24 (12.3) | 1.12 (0.42–2.97)                                   | 0.816 | 2.68 (1.39–5.19)      | 0.003  | 2.29 (0.88–5.92) | 0.088 |
| New onset of stroke  | 5 (1.5)                            | 1 (1.0)   | 13 (6.7)  | 0.70 (0.08–6.08)                                   | 0.742 | 4.81 (1.65–13.98)     | 0.004  | 6.95 (0.89–54.5) | 0.065 |
| In-hospital death    | 60 (18.3)                          | 19 (19.2) | 76 (39.0) | 1.07 (0.60–1.93)                                   | 0.809 | 3.03 (2.00–4.58)      | <0.001 | 2.78 (1.53–5.05) | 0.001 |

Abbreviations: AV block: atrioventricular block, VT/VF: ventricular tachycardia/ventricular fibrillation

OR = odds ratio; CI = confidence interval; ECMO: extracorporeal membrane oxygenation; IABP: intra-aortic balloon pump; MCS: mechanical circulation support

‡ adjusted for age, gender, and baseline characteristics listed in supplemental Table 2

Table S6. Long-term outcomes in survivors from acute myocarditis between Non-MCS with inotropic agents, IABP and ECMO groups

| Variable                            | Number of events (%)               |                  |                   | Adjusted hazard ratios and 95% confidence intervals‡ |             |                       |             |                    |       |
|-------------------------------------|------------------------------------|------------------|-------------------|------------------------------------------------------|-------------|-----------------------|-------------|--------------------|-------|
|                                     | Non-MCS                            |                  |                   | IABP vs. Non-MCS with                                |             | ECMO vs. Non-MCS with |             | ECMO vs. IABP      |       |
|                                     | with inotropic agents<br>(n = 268) | IABP<br>(n = 80) | ECMO<br>(n = 119) | inotropic agents                                     |             | inotropic agents      |             |                    |       |
|                                     |                                    |                  | HR (95% CI)       | P                                                    | HR (95% CI) | P                     | HR (95% CI) | P                  |       |
| <b>Primary outcomes</b>             |                                    |                  |                   |                                                      |             |                       |             |                    |       |
| HF hospitalization*                 | 19 (7.1)                           | 5 (6.3)          | 10 (8.4)          | 0.70 (0.24, 2.03)                                    | 0.509       | 1.14 (0.48, 2.67)     | 0.767       | 1.63 (0.52, 5.16)  | 0.406 |
| HF hospitalization within 3 months* | 8 (3.0)                            | 3 (3.8)          | 2 (1.7)           | 1.11 (0.26, 4.87)                                    | 0.886       | 0.51 (0.08, 3.20)     | 0.470       | 0.46 (0.07, 3.00)  | 0.413 |
| HF hospitalization after 3 months*  | 11 (4.1)                           | 2 (2.5)          | 8 (6.7)           | 0.40 (0.08, 2.11)                                    | 0.282       | 1.74 (0.60, 5.11)     | 0.310       | 4.34 (0.81, 23.34) | 0.088 |
| CV death                            | 39 (14.6)                          | 8 (10.0)         | 26 (21.8)         | 0.75 (0.34, 1.65)                                    | 0.475       | 2.03 (1.20, 3.46)     | 0.009       | 2.71 (1.19, 6.16)  | 0.018 |
| CV death within 3 months            | 19 (7.1)                           | 4 (5.0)          | 19 (16.0)         | 1.01 (0.34, 3.02)                                    | 0.986       | 3.00 (1.53, 5.89)     | 0.001       | 2.97 (0.98, 8.95)  | 0.053 |
| CV death after 3 months             | 20 (7.5)                           | 4 (5.0)          | 7 (5.9)           | 0.59 (0.19, 1.81)                                    | 0.358       | 0.91 (0.35, 2.38)     | 0.851       | 1.55 (0.42, 5.64)  | 0.510 |
| All-cause mortality                 | 77 (28.7)                          | 12 (15.0)        | 32 (26.9)         | 0.47 (0.25, 0.89)                                    | 0.019       | 1.26 (0.82, 1.95)     | 0.294       | 2.67 (1.35, 5.30)  | 0.005 |
| Mortality within 3 months           | 36 (13.4)                          | 4 (5.0)          | 22 (18.5)         | 0.45 (0.16, 1.29)                                    | 0.138       | 1.76 (1.01, 3.07)     | 0.046       | 3.90 (1.32, 11.47) | 0.014 |
| Mortality after 3 months            | 41 (15.3)                          | 8 (10.0)         | 10 (8.4)          | 0.40 (0.18, 0.91)                                    | 0.029       | 0.69 (0.32, 1.50)     | 0.352       | 1.72 (0.64, 4.64)  | 0.282 |
| <b>Secondary outcomes</b>           |                                    |                  |                   |                                                      |             |                       |             |                    |       |
| New dialysis                        | 3 (1.1)                            | 0 (0.0)          | 0 (0.0)           | NA                                                   | NA          | NA                    | NA          | NA                 | NA    |
| VT/VF                               | 3 (1.1)                            | 0 (0.0)          | 1 (0.8)           | NA                                                   | NA          | 0.68 (0.05–9.96)      | 0.781       | NA                 | NA    |
| Stroke                              | 8 (3.0)                            | 0 (0.0)          | 1 (0.8)           | NA                                                   | NA          | 0.30 (0.03–3.32)      | 0.326       | NA                 | NA    |

Abbreviations: CV death: cardiovascular death; HF: heart failure, VT/VF: ventricular tachycardia/ventricular fibrillation

HR = hazard ratio; CI = confidence interval; ECMO: extracorporeal membrane oxygenation; IABP: intra-aortic balloon pump; MCS: mechanical circulation support;

\* Fine and Gray's sub-distribution hazard model using all-cause mortality as a competing risk;

‡ Adjusted for age, gender, baseline characteristics and medications listed in supplemental Table S2 and in-hospital complications including high-degree atrioventricular block, ventricular tachycardia/ventricular fibrillation and acute renal failure.



Table S7. Primary outcomes of acute myocarditis by examination

| Outcome             | Heart MRI |            |                 | Cardiac biopsy |            |                 | Virus detection |           |                 |
|---------------------|-----------|------------|-----------------|----------------|------------|-----------------|-----------------|-----------|-----------------|
|                     | Yes       | No         | <i>P</i> value§ | Yes            | No         | <i>P</i> value§ | Yes             | No        | <i>P</i> value§ |
| Number of patients  | 49        | 930        | —               | 62             | 917        | —               | 642             | 337       | —               |
| Heart failure       | 3 (6.1)   | 77 (8.3)   | 0.561           | 3 (4.8)        | 77 (8.4)   | 0.234           | 56 (8.7)        | 24 (7.1)  | 0.316           |
| CV death            | 6 (12.2)  | 129 (13.9) | 0.944           | 7 (11.3)       | 128 (14.0) | 0.381           | 81 (12.6)       | 54 (16.0) | 0.232           |
| All cause mortality | 12 (24.5) | 229 (24.6) | 0.823           | 13 (21.0)      | 228 (24.9) | 0.914           | 148 (23.1)      | 93 (27.6) | 0.529           |

Abbreviations: CV death: cardiovascular death; MRI: magnetic resonance imaging

§ Obtained from multivariable Cox regression which was adjusted for age, gender, hypertension, diabetes, dyslipidemia, COPD, high-degree AV block, VT/VF, acute renal failure, ACEi/ARB, beta blockers, K sparing diuretics, and study groups.

## Supplemental Figure Legends

**Fig. S1:** Kaplan–Meier estimates of the cumulative incidence of heart failure between three groups: non-MCS group; IABP group and ECMO group. MCS: mechanical circulatory support; ECMO: extracorporeal membrane oxygenation; IABP: intra-aortic balloon pump.

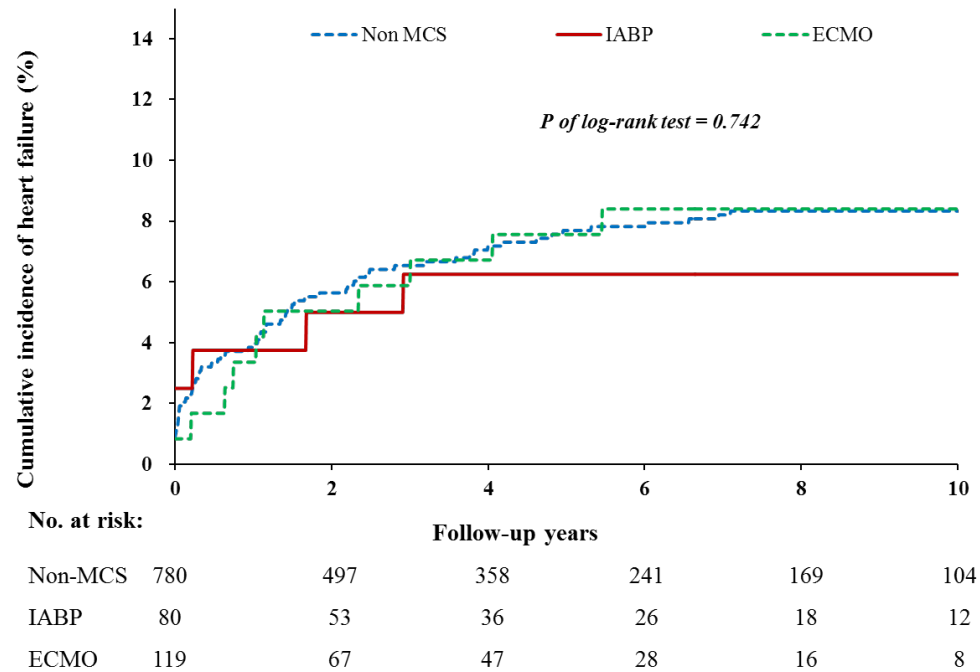

**Fig. S2:** Kaplan–Meier estimates of the cumulative incidence of accumulative incidence between three groups: non-MCS with inotropic agent group. **(A)** The cumulative incidence of cardiovascular death after index admission, **(B)** The cumulative incidence of all-cause mortality after index admission IABP group and ECMO group. MCS: mechanical circulatory support; ECMO: extracorporeal membrane oxygenation; IABP: intra-aortic balloon pump.

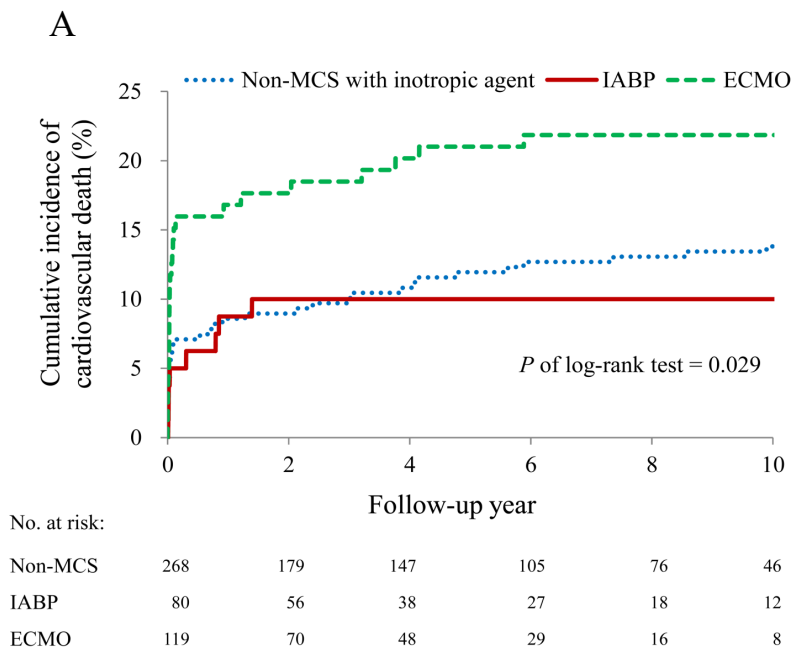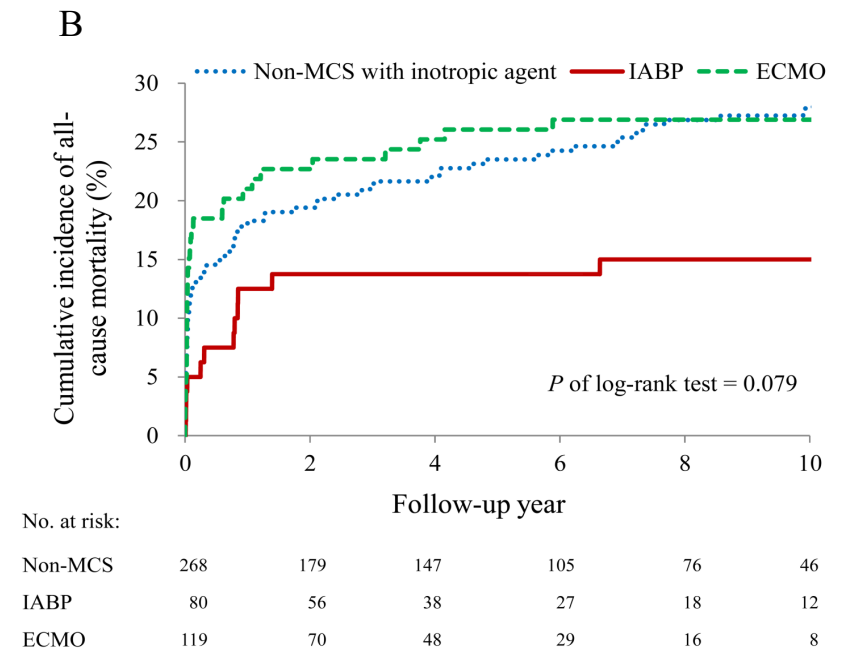

Supplement: ijmsv14p1241s1.pdf [file ijmsv14p1241s1.pdf]
